# Supplementary material for: Depletion of the RNA-Binding Protein RBP33 Results in Increased Expression of Silenced RNA Polymerase II Transcripts in Trypanosoma brucei
Source: PubMed Central journal article supplement (PMC4162612; doi:10.1371/journal.pone.0107608), 2014-09-12
Supplement: pone.0107608.s001.pdf [file pone.0107608.s001.pdf]

|         |     |                                                                 |
|---------|-----|-----------------------------------------------------------------|
| Tbrucei | 1   | MSTGDPTVPLEEEAISAEKCTRFFIGGLHRQITPQDVEEYFSNFGDVMTFILKRDPSGNS    |
| Lmajor  | 1   | -----MPLTMHSSPHYKFFVSGIARHVSGDVVEAYFRGYGSGVRLQLMRDKDGLS         |
| Tcruzi  | 1   | MQVSDPTAASVEDTSSSVKDYRYFIGGIQRHITQODIERYFSAFGEFEGFTMKRDSAGNS    |
| <hr/>   |     |                                                                 |
| Tbrucei | 61  | RGFGWVVFNSPPTGVORPEPHYLKG--VKLTVEPALANV-----RTDRVRRVPGGGSSIP    |
| Lmajor  | 51  | LGYGWLTTFESVDVERVVASQHELGGSPVMLRYQPGKKSPKSQPAASPPPPPSQPINVPT    |
| Tcruzi  | 61  | RGYGWISYRSPPLGIARQDPHV LKG--VVLTVEQARSRGPHEGNRSEKRSYVNEGASLRR   |
| <hr/>   |     |                                                                 |
| Tbrucei | 114 | GRRRERSLSDSSSVSSRNSSLSTGDPDGVRRPRLYDRHVEGSRLPAFGAVASRLPPLPS     |
| Lmajor  | 111 | QGRS-----QEYFPKHKRYREETFRPQVHTAS-RTAQIQTEIMPPKQTLPGQSLPK        |
| Tcruzi  | 119 | RRSRSPSSSSSSSVASRRGNVRR-----FTSSRQENANSTSRLPPIAVGNSRLPPLST      |
| <hr/>   |     |                                                                 |
| Tbrucei | 174 | EAFVQ-PPQIQATTFELAAPAPSR-DA--PAASASETYLCIPLSLCPPPEFSNDPRTFCAK   |
| Lmajor  | 164 | ESRQP-ETEPSPTPMPQTVPLQHQFSSSPQEPVAQPVFACIPLSICPGAFLHDPRVFCCT    |
| Tcruzi  | 172 | QMYSSAPPAQSSSTSTTIHGNVVSST-NNCDDGNTVTETYLCPITITLCPSEYLSDPRTFCAR |
| <hr/>   |     |                                                                 |
| Tbrucei | 230 | LDQSRVGGLSIIPSPSIAQVGPAPHSVPIPQGLP-GGTVMVPOHSRSQPVRSRGGGG---    |
| Lmajor  | 223 | LDPQVQVKLSILVTPTPHAALPNHHAEQAAAYVVP-G--IPQQHSTYASVNSKRVSQPTP    |
| Tcruzi  | 231 | LDQNRVGSLSNIVPTPLVST-NAASVSVPPPPPPPPPSRNLSQYGLIGERDSRNNAG---    |
| <hr/>   |     |                                                                 |
| Tbrucei | 286 | -GRHPKSSGSHHSIPPPLPQPAPPNYDSVMRHNS-----                         |
| Lmajor  | 280 | LSMPLLSSGPAPSPPPP-PGPPPHLTAPFRETVPPPPGPPPPPPPPGPPPTKSCSSGIP     |
| Tcruzi  | 287 | -LPQSVSSSSTTRVAMQRMTH-----                                      |
| <hr/>   |     |                                                                 |
| Tbrucei |     | -----                                                           |
| Lmajor  | 339 | LRFPFPPGPPPRRY                                                  |
| Tcruzi  |     | -----                                                           |

 RRM domain  
 Nuclear localization signal  
 Disordered
