# Supplementary material for: Depletion of the RNA-Binding Protein RBP33 Results in Increased Expression of Silenced RNA Polymerase II Transcripts in Trypanosoma brucei
Source: PubMed Central journal article supplement (PMC4162612; doi:10.1371/journal.pone.0107608), 2014-09-12

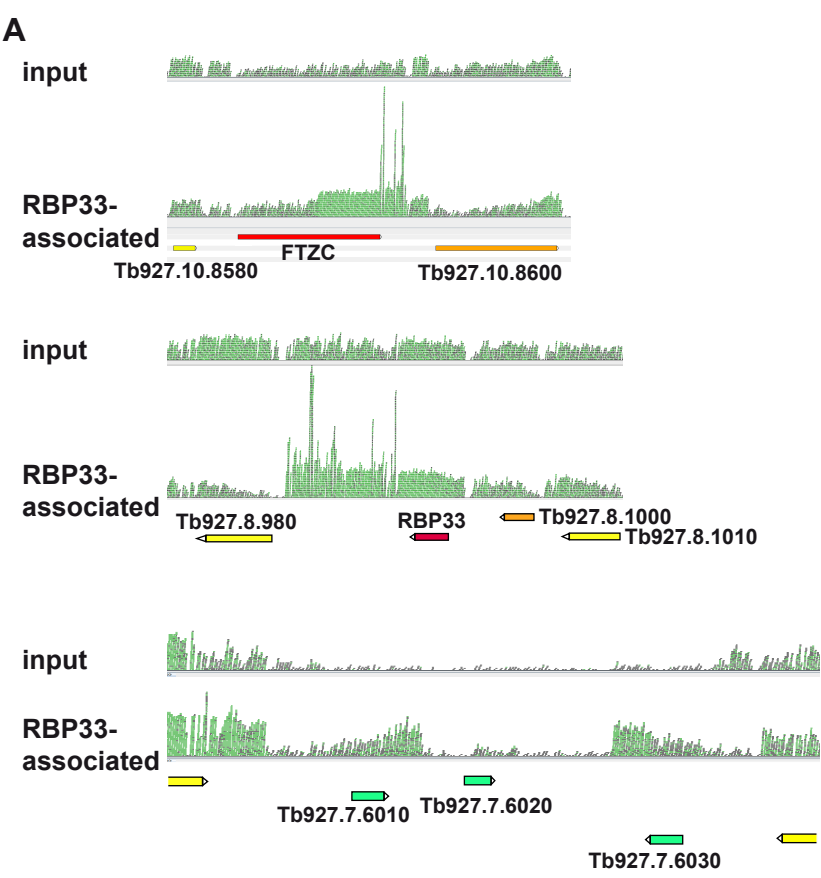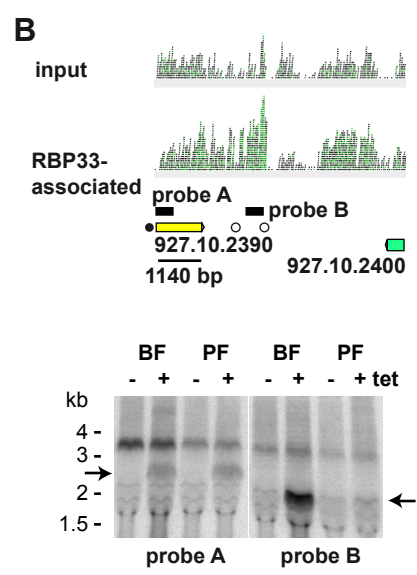

Supplement: pone.0107608.s003.pdf [file pone.0107608.s003.pdf]
